# Supplementary material for: Genome of Epinotia aporema granulovirus (EpapGV), a polyorganotropic fast killing betabaculovirus with a novel thymidylate kinase gene
Source: PubMed Central journal article supplement (PMC3496565; doi:10.1186/1471-2164-13-548), 2012-10-11
Supplement: 1471-2164-13-548-S1.pdf [file 1471-2164-13-548-S1.pdf]

|    |                        |               |      |      |              |              |              |              |              |              |              |              |              |              |               |              |              |
|----|------------------------|---------------|------|------|--------------|--------------|--------------|--------------|--------------|--------------|--------------|--------------|--------------|--------------|---------------|--------------|--------------|
| 47 | <i>pif-2</i>           | 40662 > 41786 | 374  | L    | 48 (64) 372  | 45 (62) 373  | 39 (56) 375  | 44 (56) 366  | 37 (58) 368  | 45 (48) 388  | 43 (53) 382  | 42 (49) 388  | 35 (65) 374  | 39 (54) 378  | 43 (49) 388   | 40 (61) 375  | 22 (49) 382  |
| 48 |                        | 41789 > 43129 | 446  | L    | 50 (10) 727  | 47 (14) 714  | 42 (14) 875  | 46 (11) 675  | 38 (21) 153  | 47 (18) 220  | 45 (15) 840  | 44 (13) 1279 |              | 41 (11) 848  | 45 (13) 1213  | 42 (12) 803  |              |
| 49 |                        | 43254 > 47651 | 1465 |      |              |              |              |              |              |              |              |              |              |              |               |              |              |
| 50 |                        | 47649 < 48287 | 213  | L    | 52 (55) 342  | 50 (61) 206  | 43 (54) 202  | 47 (58) 302  | 40 (54) 206  | 50 (51) 272  | 46 (57) 219  | 45 (50) 257  | 37 (57) 210  | 42 (51) 220  | 47 (49) 260   | 43 (61) 210  | 106 (33) 61  |
| 51 |                        | 48253 < 48459 | 69   | E    |              |              |              |              |              |              |              |              |              |              |               |              |              |
| 52 | <i>ubiquitin</i>       | 48485 < 48766 | 93   | L    | 54 (83) 94   | 52 (86) 76   | 45 (73) 94   | 49 (78) 94   | 42 (80) 114  | 52 (82) 97   | 47 (70) 97   | 47 (82) 77   | 39 (80) 95   | 45 (78) 93   | 50 (82) 77    | 45 (75) 95   | 35 (77) 77   |
| 53 | <i>odv-ec43</i>        | 48844 > 49887 | 348  | L    | 55 (48) 326  | 53 (54) 348  | 46 (53) 349  | 50 (46) 269  | 43 (47) 414  | 53 (43) 353  | 48 (61) 373  | 48 (43) 353  | 40 (57) 343  | 46 (47) 358  | 51 (44) 353   | 46 (57) 354  | 109 (32) 390 |
| 54 |                        | 50019 < 50465 | 148  |      |              |              |              |              |              |              |              |              |              |              |               |              |              |
| 55 |                        | 50602 < 51075 | 157  | E, L |              |              |              |              |              |              |              |              |              |              |               |              |              |
| 56 | <i>39k/pp31</i>        | 51176 < 51916 | 247  | E    | 57 (25) 241  | 55 (28) 255  | 49 (30) 278  | 52 (37) 231  | 45 (27) 252  | 55 (24) 295  | 51 (35) 274  | 50 (25) 293  | 42 (27) 251  | 48 (25) 285  | 53 (24) 298   | 48 (30) 287  | 36 (11) 275  |
| 57 | <i>lef-11</i>          | 51897 < 52211 | 104  |      | 58 (40) 134  | 56 (45) 94   | 50 (44) 94   | 53 (44) 88   | 46 (49) 96   | 56 (48) 102  | 52 (46) 106  | 51 (48) 102  | 43 (42) 92   | 49 (46) 98   | 54 (49) 95    | 49 (44) 92   | 37 (22) 112  |
| 58 | <i>sod</i>             | 52132 < 52683 | 183  | L    | 59 (65) 132  | 57 (65) 151  | 51 (58) 152  | 54 (61) 166  | 47 (61) 153  | 68 (68) 153  | 54 (65) 156  | 63 (67) 154  | 44 (61) 161  |              | 64 (66) 153   | 50 (67) 156  | 31 (58) 151  |
| 59 | <i>p74</i>             | 53154 < 55115 | 653  | L    | 60 (55) 688  | 58 (53) 670  | 53 (50) 642  | 55 (51) 658  | 49 (49) 578  | 77 (44) 710  | 56 (47) 675  | 72 (43) 710  | 46 (53) 664  | 56 (30) 144  | 77 (42) 710   | 51 (55) 677  | 138 (40) 645 |
| 60 |                        | 55140 < 56888 | 582  |      |              |              |              |              |              |              |              |              |              |              |               |              |              |
| 61 |                        | 57682 < 58236 | 184  | E    | 16 (42) 196  | 15 (47) 197  |              | 14 (42) 205  |              |              | 14 (48) 211  |              |              |              |               |              |              |
| 62 |                        | 58654 > 58974 | 106  | L    | 62 (37) 189  | 60 (40) 104  | 57 (17) 66   | 60 (34) 172  | 50 (35) 135  | 77a          | 59 (31) 155  | 73 (34) 104  | 49 (37) 120  | 57 (38) 87   | 78 (30) 111   | 55 (42) 147  |              |
| 63 | <i>p47</i>             | 59013 > 60200 | 395  |      | 68 (59) 460  | 61 (59) 387  | 58 (53) 388  | 61 (59) 399  | 51 (58) 386  | 78 (56) 394  | 60 (57) 403  | 74 (56) 394  | 50 (60) 385  | 58 (56) 397  | 79 (56) 394   | 56 (63) 399  | 40 (42) 401  |
| 64 | <i>tmpk</i>            | 60092 < 60766 | 224  |      |              |              |              |              |              |              |              |              |              |              |               |              |              |
| 65 | <i>Nudix hidrolase</i> | 60861 > 61538 | 226  |      | 69 (57) 220  | 62 (58) 221  | 59 (52) 225  | 62 (51) 215  | 52 (58) 207  | 79 (62) 225  | 61 (64) 220  | 77 (62) 225  | 51 (54) 217  | 59 (61) 222  | 82 (63) 225   | 57 (58) 221  | 38 (36) 216  |
| 66 | <i>p24</i>             | 61570 > 62067 | 165  | L    | 71 (55) 203  | 63 (56) 183  | 60 (52) 156  | 63 (47) 167  | 53 (59) 159  | 80 (48) 182  | 62 (61) 177  | 78 (48) 182  | 52 (56) 182  | 60 (53) 162  | 83 (46) 171   | 58 (51) 217  | 129 (24) 198 |
| 67 | <i>38.7 kD</i>         | 62086 < 62571 | 161  |      | 73 (22) 198  | 65 (27) 151  | 61 (16) 188  | 65 (25) 185  | 54 (29) 150  | 81 (22) 184  | 63 (29) 193  | 79 (22) 184  | 54 (32) 166  | 61 (18) 153  | 84 (24) 192   | 59 (28) 174  | 13 (18) 327  |
| 68 | <i>lef-1</i>           | 62555 < 63256 | 233  |      | 74 (56) 235  | 66 (54) 235  | 62 (55) 233  | 66 (57) 233  | 55 (53) 251  | 82 (48) 238  | 64 (52) 253  | 80 (48) 238  | 55 (58) 233  | 62 (53) 277  | 85 (46) 238   | 60 (57) 233  | 14 (34) 266  |
| 69 | <i>pif-1</i>           | 63280 > 64896 | 538  | L    | 75 (56) 538  | 67 (54) 535  | 63 (51) 533  | 67 (47) 522  | 7 (53) 536   | 84 (46) 540  | 65 (35) 547  | 82 (47) 540  | 56 (57) 529  | 64 (47) 538  | 61 (54) 541   | 61 (54) 541  | 119 (35) 530 |
| 70 | <i>fgf-1</i>           | 64896 < 65570 | 225  |      | 76 (27) 195  | 68 (27) 230  | 64 (30) 231  | 69 (32) 239  | 56 (28) 221  | 85 (20) 232  | 66 (30) 225  | 83 (20) 232  | 57 (32) 223  | 66 (30) 232  | 88 (21) 233   | 62 (30) 226  |              |
| 71 |                        | 65613 < 65927 | 104  | E    |              |              |              | 70 (29) 105  |              |              |              |              | 58 (22) 100  |              |               | 63 (25) 99   |              |
| 72 |                        | 65935 > 66120 | 61   | L    |              |              |              |              |              |              |              |              |              |              |               |              |              |
| 73 |                        | 66113 > 66571 | 152  | E, L | 79 (29) 156  | 70 (28) 154  | 66 (27) 151  | 71 (29) 152  | 59 (22) 79   | 87 (30) 164  | 67 (25) 108  | 85 (30) 164  | 59 (27) 152  | 68 (30) 81   | 90 (28) 164   | 64 (26) 160  |              |
| 74 | <i>lef-6</i>           | 55564 < 66812 | 82   |      | 80 (33) 101  | 71 (30) 102  | 67 (26) 102  | 72 (27) 94   | 60 (29) 86   | 88 (30) 99   | 68 (34) 82   | 86 (32) 99   | 60 (31) 84   | 69 (32) 99   | 91 (33) 99    | 65 (26) 104  | 28 (15) 173  |
| 75 | <i>dbp</i>             | 66873 < 67712 | 279  |      | 81 (26) 290  | 72 (25) 284  | 68 (27) 336  | 73 (28) 277  | 61 (25) 263  | 89 (18) 277  | 69 (33) 296  | 87 (18) 277  | 61 (28) 275  | 70 (23) 270  | 92 (19) 277   | 66 (28) 281  | 25 (14) 316  |
| 76 |                        | 67749 < 67952 | 67   |      | 82 (23) 306  | 73 (20) 284  |              | 62 (23) 136  |              |              | 70 (29) 100  | 88 (20) 70   | 62 (21) 86   | 71 (31) 50   | 93 (18) 70    |              |              |
| 77 |                        | 67906 < 68580 | 224  |      | 82 (19) 306  | 73 (25) 284  |              | 74 (13) 175  |              | 90 (13) 246  | 71 (23) 292  | 89 (13) 246  | 63 (22) 198  | 72 (12) 283  |               | 67 (28) 193  |              |
| 78 | <i>p48/p45</i>         | 68579 > 69721 | 380  | E    | 83 (57) 439  | 74 (56) 392  | 69 (54) 396  | 75 (58) 379  | 63 (52) 377  | 91 (55) 372  | 72 (55) 394  | 90 (55) 372  | 64 (57) 389  | 73 (51) 373  | 95 (56) 372   | 68 (58) 389  | 103 (32) 187 |
| 79 | <i>p12</i>             | 69751 > 70098 | 115  | L    | 84 (50) 109  | 75 (48) 110  | 70 (44) 118  | 76 (24) 108  | 64 (36) 96   | 92 (39) 120  | 73 (55) 106  | 91 (39) 121  | 65 (38) 111  | 74 (41) 112  | 96 (42) 121   | 69 (44) 109  | 102 (13) 122 |
| 80 | <i>bv/odv-c42</i>      | 70165 > 71286 | 373  | L    | 85 (51) 380  | 76 (49) 379  | 71 (46) 396  | 77 (46) 379  | 66 (48) 366  | 93 (44) 372  | 74 (54) 373  | 92 (45) 371  | 66 (49) 374  | 75 (52) 369  | 97 (45) 370   | 70 (51) 374  | 101 (19) 361 |
| 81 | <i>p6.9</i>            | 71306 > 71473 | 55   | L    | 86 (74) 49   | 77 (63) 58   | 72 (50) 55   | 78 (56) 54   | 67 (63) 56   | 94 (72) 60   | 75 (67) 61   | 93 (72) 58   | 67 (65) 57   | 75b (74) 60  | 98 (74) 60    | 71 (63) 58   | 100 (44) 55  |
| 82 | <i>lef-5</i>           | 71514 < 72266 | 251  |      | 87 (54) 242  | 78 (55) 240  | 73 (51) 247  | 79 (54) 240  | 69 (52) 247  | 95 (53) 245  | 76 (53) 251  | 94 (53) 268  | 68 (57) 240  | 76 (51) 247  | 99 (53) 266   | 72 (57) 245  | 99 (41) 265  |
| 83 | <i>38K</i>             | 72198 > 73085 | 295  | L    | 88 (50) 343  | 79 (52) 343  | 74 (54) 298  | 80 (50) 299  | 70 (50) 340  | 96 (51) 301  | 77 (53) 297  | 95 (51) 301  | 69 (53) 298  | 77 (52) 299  | 100 (52) 303  | 73 (54) 301  | 98 (40) 320  |
| 84 | <i>pif-4</i>           | 73088 < 73576 | 162  | L    | 89 (42) 161  | 80 (44) 162  | 75 (36) 166  | 81 (36) 162  | 71 (42) 161  | 97 (40) 157  | 78 (48) 161  | 96 (40) 157  | 70 (46) 161  | 79 (42) 159  | 101 (40) 157  | 74 (44) 161  | 96 (26) 173  |
| 85 | <i>helicase 1</i>      | 73698 > 76952 | 1085 | L    | 90 (34) 1131 | 81 (35) 1128 | 76 (34) 1138 | 82 (34) 1133 | 72 (33) 1124 | 98 (34) 1159 | 79 (35) 1156 | 97 (34) 1160 | 71 (36) 1122 | 80 (33) 1162 | 102 (34) 1158 | 75 (34) 1133 | 95 (22) 1221 |
| 86 | <i>odv-e25</i>         | 76960 < 77601 | 213  | L    | 91 (73) 213  | 82 (72) 213  | 77 (65) 217  | 83 (64) 214  | 74 (66) 214  | 99 (65) 220  | 81 (63) 217  | 98 (64) 220  | 72 (72) 213  | 81 (68) 217  | 103 (64) 219  | 76 (71) 214  | 94 (36) 228  |
| 87 | <i>p18</i>             | 77624 < 78100 | 158  | L    | 92 (44) 161  | 83 (42) 161  | 78 (35) 164  | 84 (40) 161  | 75 (49) 156  | 100 (40) 122 | 82 (49) 167  | 99 (37) 158  | 73 (44) 160  | 82 (37) 155  | 104 (38) 158  | 77 (48) 162  | 93 (28) 161  |
| 88 | <i>p33</i>             | 78114 > 78878 | 254  | L    | 93 (57) 251  | 84 (56) 250  | 79 (49) 267  | 85 (54) 252  | 76 (58) 250  | 101 (51) 251 | 83 (54) 252  | 100 (52) 252 | 74 (58) 251  | 83 (53) 251  | 105 (53) 251  | 78 (65) 251  | 92 (35) 259  |
| 89 |                        | 78917 < 79177 | 86   |      |              |              |              |              |              |              |              |              |              |              |               |              |              |
| 90 | <i>chaB</i>            | 79174 < 79401 | 75   | L    |              |              |              |              |              | 102 (29) 87  | 84 (31) 81   | 103 (31) 87  |              | 84 (38) 78   | 106 (27) 87   |              |              |
| 91 | <i>lef-4</i>           | 79408 < 80751 | 447  |      | 95 (51) 480  | 86 (51) 472  | 80 (46) 452  | 87 (49) 441  | 78 (46) 432  | 110 (43) 447 | 85 (48) 468  | 112 (43) 450 | 75 (50) 464  | 86 (46) 438  | 114 (41) 452  | 80 (50) 478  | 90 (32) 464  |
| 92 | <i>vp39</i>            | 80789 > 81670 | 293  | L    | 96 (40) 285  | 87 (40) 283  | 81 (42) 291  | 88 (37) 293  | 79 (42) 320  | 111 (44) 329 | 86 (46) 292  | 113 (44) 329 | 76 (42) 286  | 87 (45) 317  | 115 (44) 327  | 81 (46) 286  | 89 (29) 347  |
| 93 | <i>odv-ec27</i>        | 81729 > 82583 | 284  | L    | 97 (46) 288  | 88 (46) 287  | 82 (44) 282  | 89 (45) 287  | 80 (47) 287  | 112 (44) 288 | 87 (48) 298  | 114 (44) 288 | 77 (46) 284  | 88 (48) 284  | 116 (43) 288  | 82 (47) 286  | 144 (21) 290 |
| 94 |                        | 83383 < 84462 | 359  |      | 99 (28) 394  | 90 (32) 370  | 83 (24) 355  | 92 (24) 403  | 82 (29) 340  | 113 (29) 373 | 88 (35) 381  | 116 (30) 372 | 78 (31) 401  | 89 (32) 340  | 117 (30) 404  | 83 (28) 383  |              |
| 95 |                        | 84552 > 84773 | 73   | E, L | 100 (40) 108 | 91 (45) 99   | 84 (18) 92   | 93 (33) 97   | 83 (32) 69   | 116 (46) 123 | 90 (42) 124  | 119 (46) 123 | 79 (29) 94   | 90 (38) 92   | 120 (46) 123  | 84 (36) 97   |              |
| 96 | <i>vp91</i>            | 84757 < 86457 | 567  | L    | 101 (42) 665 | 92 (39) 618  | 85 (40) 591  | 94 (38) 712  | 84 (40) 533  | 118 (32) 741 | 91 (36) 656  | 121 (31) 736 | 80 (41) 656  | 92 (32) 557  | 122 (32) 751  | 85 (40) 648  | 83 (24) 847  |
| 97 | <i>tip20</i>           | 86411 > 86872 | 153  | L    | 102 (27) 216 | 93 (28) 162  | 86 (31) 126  | 95 (32) 117  | 85 (23) 139  | 119 (21) 161 | 93 (29) 177  | 122 (21) 159 | 81 (31) 109  | 93 (23) 173  | 123 (21) 164  | 86 (30) 182  | 82 (16) 180  |

|     |                    |                 |      |      |               |               |              |               |              |               |               |               |              |               |               |              |              |
|-----|--------------------|-----------------|------|------|---------------|---------------|--------------|---------------|--------------|---------------|---------------|---------------|--------------|---------------|---------------|--------------|--------------|
| 98  |                    | 86841 > 87416   | 191  | L    | 103 (68) 191  | 94 (67) 187   | 87 (62) 190  | 96 (64) 223   | 86 (58) 191  | 120 (56) 187  | 94 (56) 197   | 123 (56) 187  | 82 (67) 236  | 94 (56) 189   | 124 (57) 187  | 87 (64) 196  | 81 (43) 233  |
| 99  | <i>gp41</i>        | 87413 > 88273   | 286  | E, L | 104 (64) 289  | 95 (62) 289   | 88 (47) 289  | 97 (59) 285   | 87 (46) 283  | 121 (48) 290  | 95 (58) 309   | 124 (48) 290  | 83 (61) 279  | 95 (57) 285   | 125 (48) 290  | 88 (64) 286  | 80 (32) 409  |
| 100 |                    | 88301 > 88567   | 88   | L    | 105 (30) 111  | 96 (30) 85    | 90 (29) 90   | 98 (28) 85    | 88 (23) 89   | 122 (29) 103  | 96 (26) 105   | 125 (28)103   | 85 (28) 84   | 96 (26)93     | 126 (32) 107  | 89 (28) 97   | 78 (21) 109  |
| 101 | <i>vif-1</i>       | 88545 > 89648   | 368  | L    | 106 (49) 378  | 97 (47) 375   | 91 (48) 358  | 99 (50) 381   | 89 (45) 346  | 123 (48) 373  | 97 (49) 382   | 126 (48) 374  | 86 (46) 377  | 97 (48) 372   | 127 (50) 371  | 90 (48) 375  | 77 (31) 379  |
| 102 |                    | 89658 > 89915   | 85   | L    | 107 (62) 84   | 98 (63) 83    | 92 (58) 84   | 100 (58) 85   | 91 (58) 81   | 125 (62) 85   | 99 (61) 85    | 128 (62) 85   | 88 (63) 94   | 99 (61) 85    | 129 (64) 85   | 91 (69) 84   | 76 (30) 84   |
| 103 |                    | 89928 > 90377   | 149  | L    | 108 (52) 148  | 99 (55) 149   | 93 (45) 154  | 101 (53) 145  | 92 (37) 145  | 126 (38) 145  | 100 (48) 148  | 129 (38) 145  | 89 (55) 150  | 100 (42) 148  | 130 (38) 145  | 92 (50) 150  | 75 (17) 133  |
| 104 |                    | 90771 > 90962   | 63   |      |               |               |              |               |              |               |               |               |              |               |               |              |              |
| 105 |                    | 90859 < 91272   | 137  |      |               |               |              |               |              |               |               |               |              |               |               |              | 63 (28) 155  |
| 106 | <i>dna pol</i>     | 91293 < 94493   | 1056 | E    | 111 (56) 1051 | 101 (55) 1045 | 94 (55) 1031 | 103 (58) 1021 | 93 (52) 979  | 132 (53) 1098 | 101 (58) 1145 | 134 (53) 1098 | 90 (58) 1044 | 101 (54) 1035 | 138 (52) 1094 | 93 (57) 1045 | 65 (33) 984  |
| 107 | <i>desmoplakin</i> | 94463 > 96463   | 666  |      | 112 (24) 718  | 102 (24) 720  | 95 (18) 539  | 104 (21) 751  | 94 (14) 651  | 133 (14) 661  | 102 (14) 735  | 135 (14) 661  | 91 (20) 763  | 102 (15) 603  | 139 (13) 663  | 94 (23) 741  | 66 (9) 808   |
| 108 | <i>lef-3</i>       | 96438 < 97457   | 339  | E, L | 113 (18) 353  | 103 (20) 341  | 96 (18) 346  | 105 (14) 349  | 95 (17) 297  | 134 (18) 351  | 103 (21) 342  | 136 (18) 351  | 92 (19) 337  | 103 (21) 358  | 140 (17) 345  | 95 (20) 339  | 67 (12) 385  |
| 109 | <i>odv-nc42</i>    | 97357 > 97800   | 105  |      | 114 (46) 126  | 104 (40) 127  | 97 (48) 125  | 106 (49) 125  | 96 (40) 128  | 135 (36) 120  | 104 (51) 129  | 137 (38) 136  | 93 (52) 125  | 104 (49) 129  | 141 (40) 136  | 96 (50) 125  | 68 (26) 192  |
| 110 |                    | 97866 > 98342   | 148  | E, L | 115 (21) 168  | 105 (22) 167  | 98 (34) 172  | 107 (22) 179  | 97 (25) 194  | 136 (21) 171  | 105 (31) 177  | 138 (21) 171  | 94 (29) 188  | 105 (34) 159  | 142 (22) 171  | 97 (29) 172  |              |
| 111 | <i>iap-5</i>       | 98362 > 99132   | 256  |      | 116 (51) 275  | 106 (48) 274  | 99 (40) 279  | 108 (47) 271  | 98 (42) 281  | 137 (37) 285  | 106 (49) 283  | 139 (37) 284  | 95 (46) 270  | 106 (42) 263  | 143 835) 290  | 98 (45) 272  |              |
| 112 | <i>lef-9</i>       | 99116 > 100597  | 493  |      | 117 (69) 499  | 107 (70) 499  | 100 (65) 498 | 109 (71) 497  | 99 (66) 494  | 139 (67) 493  | 107 (70) 496  | 140 (67) 493  | 96 (68) 494  | 107 (67) 503  | 145 (66) 497  | 99 (68) 493  | 62 (53) 516  |
| 113 | <i>fp</i>          | 100604 > 101044 | 146  | L    | 118 (58) 161  | 108 (58) 153  | 101 (53) 147 | 110 (53) 151  | 100 (52) 138 | 140 (52) 147  | 108 (66) 148  | 141 (51) 147  | 97 (56) 156  | 109 (56) 145  | 146 (40) 70   | 100 (57) 150 | 61 (36) 214  |
| 114 |                    | 101057 < 101545 | 162  | L    |               |               |              |               |              |               |               |               |              |               |               |              |              |
| 115 | <i>DNA ligase</i>  | 101563 < 103167 | 534  | E    | 120 (51) 570  | 110 (52) 576  | 103 (51) 547 | 112 (48) 560  | 101 (50) 523 | 141 (46) 527  | 110 (56) 565  | 142 (46) 527  | 99 (55) 557  | 110 (50) 579  | 148 (46) 552  | 102 (57) 568 |              |
| 116 |                    | 103236 > 103388 | 51   |      |               |               |              |               |              |               |               |               |              |               |               |              |              |
| 117 |                    | 103451 > 103663 | 70   |      | 122 (26) 66   | 112 (23) 68   | 104 (22) 63  | 117 (20) 66   | 103 (35) 66  | 143 (36) 66   | 112 (37) 70   | 144 (22) 66   | 101 (36) 72  |               | 150 (36) 66   | 104 (22) 71  |              |
| 118 | <i>fgf-2</i>       | 103615 < 104850 | 412  |      | 123 (33) 400  | 113 (34) 409  | 105 (19) 356 | 116 (30) 387  | 104 (23) 396 | 144 (21) 409  | 113 (33) 393  | 145 (22) 409  | 102 (31) 384 | 116 (25) 398  | 151 (22) 404  | 105 (31) 433 | 32 (12) 181  |
| 119 | <i>alk-exo</i>     | 104912 > 107569 | 886  |      | 125 (43) 398  | 115 (43) 395  | 107 (41) 413 | 114 (46) 399  | 106 (47) 378 | 145 (39) 457  | 115 (48) 397  | 146 (39) 457  | 104 (46) 403 | 117 (41) 408  | 152 (40) 473  | 107 (50) 399 | 133 (31) 419 |
| 120 | <i>helicase 2</i>  |                 |      |      | 126 (46) 457  | 116 (46) 445  | 108 (35) 495 | 113 (48) 439  | 107 (48) 436 | 146 (46) 455  | 116 (47) 471  | 147 (46) 455  | 105 (46) 461 | 118 (51) 437  | 153 (48) 457  | 108 (49) 446 |              |
| 121 |                    | 107958 < 108806 | 282  |      | 130 (24) 138  | 118 (19) 125  | 109 (14) 281 |               | 108 (22) 138 |               | 117 (21) 301  |               | 106 (19) 376 | 119 (22) 317  |               | 109 (21) 335 |              |
| 122 | <i>lef-8</i>       | 108806 < 111319 | 837  |      | 131 (67) 873  | 119 (68) 865  | 110 (63) 857 | 121 (68) 827  | 109 (65) 838 | 148 (63) 859  | 118 (68) 883  | 149 (63) 859  | 107 (67) 860 | 121 (63) 849  | 155 (63) 860  | 110 (68) 880 | 50 (49) 876  |
| 123 |                    | 111431 > 111739 | 102  | E    | 132 (22) 131  | 120 (22) 114  |              | 110 (25) 114  | 165 (27) 118 | 120 (31) 156  | 163 (27) 118  |               | 108 (20) 56  | 122 (27) 120  | 169 (28) 118  | 111 (27) 111 |              |
| 124 |                    | 111763 < 112011 | 82   |      | 133 (27) 62   |               |              |               | 170 (16) 63  |               | 121 (39) 67   |               |              |               |               | 112 (31) 54  |              |
| 125 |                    | 111926 > 112327 | 133  | E    | 134 (53) 133  | 121 (53) 133  | 111 (43) 179 | 122 (47) 133  | 112 (46) 137 | 171 (40) 139  | 122 (42) 136  | 169 (40) 139  | 109 (50) 133 | 127 (42) 165  | 173 (41) 139  | 113 (55) 133 | 53 (25) 139  |
| 126 |                    | 112322 < 113362 | 347  | L    | 135 (15) 354  | 122 (18) 314  | 113 (21) 302 | 123 (12) 322  | 113 (15) 198 | 172 (21) 378  | 124 (27) 371  | 170 (21) 378  | 110 (25) 295 | 128 (27) 316  | 174 (20) 373  | 114 (22) 323 |              |
| 127 |                    | 113436 < 113645 | 69   | L    |               |               |              |               | 114 (24) 109 | 173 (26) 67   | 125 (28) 61   | 171 (26) 67   |              | 129 (28) 75   | 175 (26) 67   | 115 (23) 70  |              |
| 128 | <i>lef-10</i>      | 113626 > 113859 | 77   | E    | 137 (34) 89   | 124 (32) 77   |              | 125 (36) 73   | 174 (42) 70  | 126 (40) 76   | 172 (42) 70   |               | 112 (38) 72  |               | 176 (40) 70   |              | 53a (20) 78  |
| 129 | <i>vp1054</i>      | 113720 > 114754 | 344  | E    | 138 (44) 332  | 125 (45) 331  | 115 (40) 324 | 126 (42) 328  | 115 (40) 311 | 175 (45) 323  | 127 (47) 331  | 173 (46) 323  | 113 (42) 330 | 130 (42) 320  | 177 (46) 323  | 116 (47) 330 | 54 (28) 365  |
| 130 |                    | 114789 > 115022 | 77   |      |               |               |              |               |              |               |               |               |              | 132 (38) 52   |               |              |              |
| 131 | <i>fgf-3</i>       | 115040 > 116041 | 333  | L    | 140 (29) 347  | 127 (33) 287  | 117 (25) 274 | 128 (24) 341  | 117 (19) 249 | 178 (22) 332  | 128 (26) 304  | 176 (21) 351  | 114 (33) 299 | 133 (24) 312  | 180 (23) 304  | 118 (34) 275 |              |
| 132 | <i>egt</i>         | 116583 < 117926 | 447  | L    | 141 (48) 484  | 128 (47) 463  | 118 (36) 445 | 129 (45) 434  | 118 (48) 429 |               | 129 (51) 462  |               | 115 (51) 448 |               | 119 (52) 462  |              | 15 (38) 506  |
| 133 | <i>me53</i>        | 117935 > 119056 | 373  | L    | 143 (33) 303  | 129 (32) 303  | 119 (32) 303 | 130 (34) 297  | 120 (34) 308 | 180 (27) 325  | 131 (34) 309  | 178 (27) 325  | 116 (35) 310 | 134 (29) 289  | 182 (29) 304  | 120 (36) 303 | 139 (14) 449 |

The position and orientation (sense > or antisense <) of 133 ORFs are shown compared to 12 granulovirus homologs and AcMNPV. The presence of early or late promoter elements is indicated by E or L, respectively.
