# Supplementary material for: Genome of Epinotia aporema granulovirus (EpapGV), a polyorganotropic fast killing betabaculovirus with a novel thymidylate kinase gene
Source: PubMed Central journal article supplement (PMC3496565; doi:10.1186/1471-2164-13-548), 2012-10-11
Supplement: 1471-2164-13-548-S2.pdf [file 1471-2164-13-548-S2.pdf]

```

AdorGV -----MEDAPYKMAIADKRFNPIHEELAKRYSLQNFINNISNANQRISHDDIMVLEKTRGQSDNVLWQLLRVNRSTAS-GSAVSEYDIDSPAIRYIGK
ChocGV -----MAYELAV---SENVLNNQELLYAEKYCLQKYVRRLT-LTHRNTKKEEIMALEHATRGQTNNMLWKILLRINRRTTASGGNT---FFEGSTPAMRYGI
CrleGV -----MAYELAV---AEGNMTDLQLEFAKKFSLQNYVTRTLT-LEHRNSKKEEILKLEESTRGQSDNLLWKLRLVRNDRDTASGSS---YCGNPNPAMQYGI
CpGV -----MAYELAV---MEDVMSDVQLELARKYSMQLNYVTRTLT-LEHKNSREEILQLEEATRGQSDNLLWKLRLINRDTASGSS---YCGGENVAMEYGL
EpapGV -----MHEFNES-----LTAEQNRLDADKYCLQNYVSNLT-LDYRNSKQEIFELEKATRGQGENELWKLRLINRRTTAS---NSGHAFYGGENEAMRYGL
PhopGV -----MSYEF---FQDCMTPQIIMLAKKYCLQNYVRSLSKVDHRNTPEEIKQLEIATRQADNLLWKLRLVRNRTTASKSTG---CFVEDSPAIOFGK
PiraGV -----MAYELAV---SEGGMSDEQLGFAKKYMLQNYIKTLT-ESHRTTTEEIMELEKATRGQAKNVLWKLRLINRRTTASGSGG---FYGETTPAMKYGI
AgseGV -----MDLSNCG-----FTDEQLKMAQKYCMENYVTKL-PGHKNTKEEIFELE-ATRGCCKNNLWKLRLVRNRTTAT-KSTGSSFYGES-VAMKYGI
HearGV -----MEQTRHTERVITMRFQNYPTYKYKRVSRDSSVFLGTAYAMDDSSNNAQ---SNLAMNEYEQQLCDKYSYSNYVARLQ-PGHVNTREEIFALERATRQSSNNALWGLVRLNRKTASNRRGCSFVSDKNEAIRYGN
PlxyGV -----MADK-----LTGYCGLSDKYCLENYASRLT-AAHRNTKQEIFELEKATRGQSKNNLWKLRLINRKTAS-KST--YFSGDT-EAMRYGI
PsunGV MRTESAVATTYCRNMDRTRLTERVITVRFQNYPTSNTIAFFTINRLFHFEPAYTMDNNSSSDPQLKKLAMNEYELQCDRYSYSNYVARLK-PGHINTRKEIFELERATRQONQNALWGLVRLNRKTASNLSGCSNFVSDNNEAIRYGI
SpliGV -----MEEKSNSEF-----FTPEQYRLVLKYRYDLYITNLK-RGHYNTREEIFELEKATRGQSSNNLWRLRLINRRTTAS-QSTCSAFNFET-EAIMYGN
XcGV -----MEQTRHTERVITMRFQNYPTYKYKRVSDNNSVFLGPAYAMDDSSNPNQ---SKLAMNEYEQQLCDKYSYSNYVARLQ-PGHVNTREEIFALERATRQSSNNALWGLVRLNRKTASNRRGCSNFVSDKNEAIRYGN

```

```

AdorGV IKEKALKNDNIIISTIKDGIETYTNKRVTTETVLDGCMFLSSIGFYSASPDAYFKLEDGSMVMEIKCPYSYKDDTIKDIRNRFNTNRARYRIPNTAFSINRHGEDIFVCVEAQNNHYRQMLQMYATGALLAVYVVKFRDMPEVHFVKRD
ChocGV CNETILKNNKAIINTITERIEKKLGGKVVENVLDCGLFITDIGLYSASPDGYFKLETGELVVLEIKCPYTYRNTKLEQIRREKNNTRGAYRVEHTALLVNRNGP-LHVTVTERNEHYRQMSQIYVTNAIMAVYVMKFSMDPEIHFVEKN
CrleGV KQEKILKEDKLIIDTVKDRIEKKLKKKIEEVLDGGLFSLTIGLCSASPDAYFILENGELVVLEIKCPYNYRNSFKSVIQQLGSKRK---RIAHTALKRVSHDP-LIHIEQRNNHYRQIQSQLYVTGAVMAVYLVKFSKDCDHLVVERN
CpGV RNEKLLKDNIVMGIIVERVEEKLNNKVAQVLECGFLSDIGLYSASPDAYFVLDGSELVVLEIKCPYTYRNDTFQSVLQQLDGRSS--RVARTALKRVSKQP-LILKVEQRNLHYRQMSQLYVTGAVMAVYVMKFSMDPDHIFVERN
EpapGV DNEKLLKQNAQLIDLVCARIEHKTQKQVVERVLDGCMFITELGLYSASPDAYFLLENNAMVMEIKCPYTYRSETLFTIRDKFNN-RNRYRVPHTAFSVNRHGEYLVNLVLEKNNNDHYRQMQAQMYVTNAVAVYVMKIGQDHMHFVERD
PhopGV NGERDLKQNTTELIDLVCQKIEQKTGKIVLEKVLCEGLFSLPIGLYSASPDAYFVLDGGLVLEIKCPYTYREDTLESVRRHMNSTRTYRYVAHTAFSVSRNGA-MNVVREKQNDHYRQIQSQLYSTNAVLAVYVMKVFVDFPEIHFVERD
PiraGV DNEKLLKKNKIVMSIREGVEKLLKKEIEEVLDGGLFSLSEIGLYSASPDAYFRLDNDLVVLEIKCPYTYRNETLESIRLKMNSRSRYRVPHTAFSVNRHDT-LHVAVEKRNNDHYRQMQAQLYVTGAVMAVYVMKFSMDPEIHFVPRD
AgseGV EQEEWIKQKQHIMDAVCEGIEGKLLKVKERVNLNCGFLSPLGIYSASPDAYFVLENEELVVLEIKCPYTYKSDSMETIRRGFNN-RSRYRIPHTAFSINKNGP-IDVRVEKKNNDHYRQMQAQLYITGAVLAVYLVKIGDVPPEIHFVERD
HearGV EQETVVKKNQLLMRTIIEKIEEKLSCDITETVLDGCMFISPIGLYSASPDAYFVNEQGQIIVLEIKCPYTYKDTNLESIRRLNKNKARYRIKHTAFTINKQGP-IEVRVEKKNNDHYRQIQSQMYVTGAVLVYLVKIGDTEEVHFVERD
PlxyGV EHEDLKKNCIVMDVLCAEIENKLNASVREVRVLECGFLFTELGLFSASPDGYFVLDGRLVMEIKCPYTYKDSLEQIISGFNN-RSRYRIPHTAFSVNKTGP-VDIRVEKLNNDHYRQMQWQMYVTGAIMAVYLVKIGDTPHVFVDRD
PsunGV NQEKVVKNQQLLMRAIEKIEEKLDCVVTQTVLDGCMFISPIGLFSASPDAYFVDEKQIIVVLEIKCPYTYRNTLCSIRNSFNRRARYRIPHTAFSINKQGP-IDVRVEKKNNDHYRQIQSQMYVTGAVLVYLVKIGDTEEVHFVERD
SpliGV RNENVVKNQNELLMRHIGEEIEHCLGKSIKEYVANCMMFISKMGHSASPDAYMLDDNIVVVEIKCPYTYREKTLTISRNSFNTRKSYRITNTAFSINRSGP-PFVKVEKNTHYRQMQAQMYVTGAVMAVYIVLIGQTPPEVHFVERN
XcGV EQETVVKKNQLLMRTIIEKIEEKLSCKITETVLDGCMFISPIGLYSASPDAYFVNEQGQIIVLEIKCPYTYKDTNLESIRRLNKNKARYRIKHTAFTINKQGP-IEVRVEKKNNDHYRQIQSQMYVSGAVLVYLVKIGDTEEVHFVERD

```

```

AdorGV SKFIQRVYNQEMNKLNRVVQSYKLSQ-SNMNTLAARMITYNRTNEFDTNSARLLAEAGMYS CDGNSVRCYICKSTYETADRSVESILSEHDN-LCN---VPKT--QAMHNSYLNIVDRINNLHQTN-LFLYEECQRLAQEGFVLIN--STT
ChocGV EQYSKEMRHKELAKLQMYVVENKRSQ-IMIMESERLKTFTNT-NFKTGLAAALACDGMYYWCG-NVVCYFCQQQFEIVDKLLEEILEEHT--ECNKEGNSIMGFKVTHPRYLNRFRINSRKRKTK--ENVVRIEELADKGGFFYD---GSK
CrleGV ESYIKELADKERFLNMIKENNRNK-KFTLEVHRLDSFKNS-GYDEEIVKQLAKNGLYCWCW-NVICFFCQGHFEINEKTIQQLINEHDNENCCKGDCNSM-TNVYKRYLNI FDRINNLNESQ-TLSLSEIRDLAKKGYND---GNK
CpGV EAYIKGLADRERMKLEMYVKENKRNK-VMSIERERVNSFRGS-GYAREMVERLAREGLYCWCW-NVICYFCGQQFEVDNKSIEEVLGEHKVEQCDRTNNVSA-VRVHDNRVYLVNVDRIINNLHTVVTLLSSVERRQLAKKGYND---GNR
EpapGV NEHINKMKKELAEFKNYTNQNSYR-CMIKEQSRYSFDS--AVEEQMRKLAAGLYNKHG-VITCYFCKSQFEINN-AIN----HD---CGTRQDNVYIYNVDNISYINERDRIDNLLNSAN-YCREQATALAKSKFYW---DGTQ
PhopGV EKYIRDLAERERIRLKIYVDENKRS-VMVSEKERLKSFEQY-GYNEHLIKSLARDGLYCWCW-NVMCYFCQQQFEI IDKNADQILAEHN-LECTKLENIAI-STAAHPEYLVNVDHMRHNLSESQ-LFNSVDCEKLAKEGFFIDQ--NNK
PiraGV EKFIKELADRELKIKMYANENKRSQ-IMVMEKERLKSFGGS-GHADK IARLLAKNGMYCWCW-NVICFFCQGHFEI IDKSIDILEEHN-KECNRQENISM-VEVGHERYLVNVDRIINNLNTQ-KYSLIECEEELAKKGYFYN---GSR
AgseGV IKQIQELKDREREFNHVRDNRNRYLVLENRKKTFFPONGAYSEKSKLLARQGFYYNQ-CVVCYFCKSKYETST-PFLEMT--HS--NCD-KTDNISHDV IKFFNYINQKDRVNNLNKYCS-YDYQQCIELANQGGFFYD-PSDNT
HearGV EEMINDYANNEKSDLKEILSENAKHM-EFVMERNRFLSFYSLPNVKNNENIKKLARDGFYYWNG-CVKCHFCQKHVELEN-DVDNILAQHV---CNSKHGNVRYADIKHRKYLTLQSRINSFIPLNI-DTT-LALELAKLVFVA--DDNN
PlxyGV EKLTKEIGERELNEFNRIVSDNKKK-YLLMEVNRKLTFFDS---ASTDSKLLAKNGFYQWYG-QIICYFCNLKYELDM-GVAAILDNHK--LCD-KTNNVKLISIAHPSYIKLQKRIDSITSTG-----DRVELAQRGFFE---QNGV
PsunGV EEMIKDFAKNEDSELKRVLSENAKHR-EFVMERNRFLSFYNSPNIKNDIVKKLARDGFYYWNG-CIKCHFCQKHVELEN-GLDNILAQHV---CNSKHGNVRYADIKHRNYLTLQSRINSFSRLNI-DST-LAQELAKLVFVVG--DDNN
SpliGV ASVIQELEAKEKKDYNTYIINNERCR-MYVMEKNNRESFKDCLESK-AAILKLSRSGFYYHFG-KIICYFCRVQVELER-GVDNALLQHAP-DCN-KEGDLRHAIFKYPRYFSDKIREQSLDRHVS-D----KQTAAKNNLFC---DGSK
XcGV EEMINDYANNEKRDLEILSENAKHM-EFVMERNRFLSFYSLPNVKNNENIKKLARDGFYYWNG-CVKCHFCQKHVELEN-DVDNILAQHV---CNSKHGNVRYADIKHRNYLTLQSRINSFIPLNI-DTT-LALELAKLVFVA--DDNH

```

```

AdorGV PELYCCGG-----KDGHHQTCYKTKQERKRIIESGS-----
ChocGV LVLYCCGGGKLLGKERHTDQCKKKEN-----
CrleGV FVLYCCGG-----EKLHSNECHK-----
CpGV LVLYCCGG-----ETTHKPECHKGQQ-----
EpapGV LRLYCCGQT-----DLHAPNCS-----
PhopGV LVLYCCGN-----EQDHDNACTKATQ-----
PiraGV LAFYCCGE-----QETHKNDYKIQ-----
AgseGV LKLFCCGEI-----DKHSQRCKDNGGETS-----
HearGV LKYCCATTIS-----DDKINQEC-IKATVINCPHVSVDTRY-----
PlxyGV LSLFCCGG-----AVHNQDCRYEEM-----
PsunGV LKYCCSTVIS-----DDKIDQQC- IKDVVKNAHSDDC-----
SpliGV IALYCCGNVIK-----SDLAESPFIDKLLDNIVHTIDCERF-----
XcGV LKYCCATTIS-----DDKINQEC-IKATVINSPHVSVDTRY-----

```

**Multiple alignment of Betabaculovirus Alkaline Exonuclease.** Multiple alignment were carried out with ClustalX v.1.64 using default parameters. Columns shaded in light blue correspond to identities and columns shaded in light orange correspond to conservative changes.
