# Supplementary material for: Genome of Epinotia aporema granulovirus (EpapGV), a polyorganotropic fast killing betabaculovirus with a novel thymidylate kinase gene
Source: PubMed Central journal article supplement (PMC3496565; doi:10.1186/1471-2164-13-548), 2012-10-11
Supplement: 1471-2164-13-548-S4.pdf [file 1471-2164-13-548-S4.pdf]

| Genus                          | Name                                    | Acronym        | Size bp | N° ORFs  | Accession Number | Reference                                  |
|--------------------------------|-----------------------------------------|----------------|---------|----------|------------------|--------------------------------------------|
| Alphabaculovirus NPVs Group I  | <i>Antheraea pernyi</i> NPV-Z           | AnpeNPV-Z      | 126.629 | 147      | DQ486030         | [1]                                        |
|                                | <i>Antheraea pernyi</i> NPV-L2          | AnpeNPV-L2     | 126.246 | 145      | EF207986         | [2]                                        |
|                                | <i>Anticarsia gemmatalis</i> NPV D2     | AgMNPV         | 132.239 | 152      | DQ813662         | [3]                                        |
|                                | <i>Autographa californica</i> NPV C6    | AcMNPV         | 133.894 | 156      | L22858           | [4]                                        |
|                                | <i>Bombyx mandarina</i> NPV             | BomaNPV        | 126.770 | 141      | NC012672         | Xu <i>et al.</i> , 2009, unpublished       |
|                                | <i>Bombyx mori</i> NPV T3               | BmNPV          | 128.413 | 143      | L33180           | [5]                                        |
|                                | <i>Choristoneura fumiferana</i> DEF NPV | CfDEFNPV       | 131.160 | 149      | AY327402         | [6]                                        |
|                                | <i>Choristoneura fumiferana</i> MNPV    | CfMNPV         | 129.593 | 146      | AF512031         | [7]                                        |
|                                | <i>Epiphyas postvittana</i> NPV         | EppoNPV        | 118.584 | 136      | AY043265         | [8]                                        |
|                                | <i>Hyphantria cunea</i> NPV             | HycuNPV        | 132.959 | 148      | AP009046         | [9]                                        |
|                                | <i>Maruca vitrata</i> MNPV              | MaviMNPV       | 111.953 | 126      | EF125867         | [10]                                       |
|                                | <i>Orgyia pseudotsugata</i> MNPV        | OpMNPV         | 131.995 | 152      | U75930           | [11]                                       |
|                                | <i>Plutella xylostella</i> MNPV CL3     | PlyxMNPV       | 134.417 | 152      | DQ457003         | [12]                                       |
| <i>Rachiplusia ou</i> MNPV     | RoMNPV                                  | 131.526        | 149     | AY145471 | [13]             |                                            |
| Alphabaculovirus NPVs Group II | <i>Adoxophyes honmai</i> NPV ADN001     | AdhoNPV        | 113.220 | 125      | AP006270         | [14]                                       |
|                                | <i>Adoxophyes orana</i> NPV             | AdorNPV        | 111.724 | 121      | EU591746         | [15]                                       |
|                                | <i>Agrotis ipsilon</i> MNPV             | AgipMNPV       | 155.122 | 163      | EU839994         | [16]                                       |
|                                | <i>Agrotis segetum</i> NPV              | AgseNPV        | 147.544 | 153      | DQ123841         | [17]                                       |
|                                | <i>Apocheima cinerarium</i> NPV         | ApciNPV        | 123876  | 118      | FJ914221         | Zhang <i>et al.</i> , unpublished          |
|                                | <i>Chrysodeixis chalcites</i> NPV       | ChchNPV        | 149.622 | 151      | AY864330         | [18]                                       |
|                                | <i>Clanis bilineata</i> NPV DZ1         | ClibiNPV       | 135.454 | 139      | DQ504428         | [19]                                       |
|                                | <i>Ecotropis obliqua</i> NPV A1         | EcobNPV        | 131.204 | 126      | DQ837165         | [20]                                       |
|                                | <i>Euproctis pseudoconspersa</i> NPV    | EupsNPV        | 141.291 | 139      | NC_012639        | [21]                                       |
|                                | <i>Helicoverpa armigera</i> MNPV        | HearMNPV       | 154.196 | 162      | EU730893         | Tang <i>et al.</i> , 2008, unpublished     |
|                                | <i>Helicoverpa armigera</i> NPV C1      | HearNPV C1     | 130.759 | 137      | AF303045         | [22]                                       |
|                                | <i>Helicoverpa armigera</i> NPV G4      | HearNPV G4     | 131.405 | 135      | AF271059         | [23]                                       |
|                                | <i>Helicoverpa armigera</i> SNPV NNg1   | HearSNPV       | 132.425 | 143      | AP010907         | [24]                                       |
|                                | <i>Helicoverpa zea</i> SNPV             | HzSNPV         | 130.869 | 139      | AF334030         | [25]                                       |
|                                | <i>Leucania separata</i> NPV AH1        | LeseNPV        | 168.041 | 169      | AY394490         | [26]                                       |
|                                | <i>Lymantria dispar</i> NPV             | LdMNPV         | 161.046 | 164      | AF081810         | [27]                                       |
|                                | <i>Lymantria xyliina</i> MNPV           | LyxyMNPV       | 156.344 | 157      | GQ202541         | [28]                                       |
|                                | <i>Mamestra configurata</i> NPV A       | MacoNPV A-90-2 | 155.060 | 169      | U59461           | [29]                                       |
|                                | <i>Mamestra configurata</i> NPV A       | MacoNPV A-90-4 | 153656  | 168      | AF539999         | [30]                                       |
|                                | <i>Mamestra configurata</i> NPV B       | MacoNPV B      | 158.482 | 168      | AY126275         | [31]                                       |
|                                | <i>Orgyia leucostigma</i> NPV CSF-77    | OrleNPV        | 156.179 | 135      | EU309041         | Eveleigh <i>et al.</i> , 2008, unpublished |
|                                | <i>Spodoptera exigua</i> NPV            | SeMNPV         | 135.611 | 139      | AF169823         | [32]                                       |
|                                | <i>Spodoptera frugiperda</i> MNPV       | SfMNPV 19      | 132.565 | 141      | EU258200         | [33]                                       |
|                                | <i>Spodoptera frugiperda</i> MNPV 3AP2  | SfMNPV 3AP2    | 131.330 | 142      | EF035042         | [34]                                       |
|                                | <i>Spodoptera litura</i> NPV G2         | SpltMNPV       | 139.342 | 141      | AF325155         | [35]                                       |
|                                | <i>Spodoptera litura</i> NPV II         | SpltNPV II     | 148.634 | 147      | EU780426         | Li <i>et al.</i> , 2008, unpublished       |
| <i>Trichoplusia ni</i> SNPV    | TrnSNPV                                 | 134.394        | 145     | DQ017380 | [36]             |                                            |

| Genus             | Name                                   | Abbreviation | Size bp | N° ORFs | Accession Number | Reference                                  |
|-------------------|----------------------------------------|--------------|---------|---------|------------------|--------------------------------------------|
| Betabaculovirus   | <i>Adoxophyes orana</i> GV             | AdorGV       | 99.657  | 119     | AF547984         | [37]                                       |
|                   | <i>Agrotis segetum</i> GV              | AgseGV       | 131.680 | 132     | AY522332         | Xiulian <i>et al.</i> , 2004, unpublished  |
|                   | <i>Choristoneura occidentalis</i> GV   | ChocGV       | 104.710 | 116     | DQ333351         | [38]                                       |
|                   | <i>Clostera anachoreta</i> GV          | ClanGV       | 101487  | 123     | HQ116624         | [39]                                       |
|                   | <i>Cryptophlebia leucotreta</i> GV CV3 | CrleGV       | 110.907 | 128     | AY229987         | [40]                                       |
|                   | <i>Cydia pomonella</i> GV              | CpGV         | 123.500 | 143     | U53466           | [41]                                       |
|                   | <i>Helicoverpa armigera</i> GV         | HearGV       | 169.794 | 179     | EU255577         | [42]                                       |
|                   | <i>Phthorimaea operculella</i> GV      | PhopGV       | 119.217 | 130     | AF499596         | Croizier <i>et al.</i> , 2002, unpublished |
|                   | <i>Pieris rapae</i> GV                 | PrGV         | 108.592 | 120     | NC_013797        | Zhang <i>et al.</i> , 2010, unpublished    |
|                   | <i>Plutella xylostella</i> GV K1       | PlyxGV K1    | 100.999 | 120     | AF270937         | [43]                                       |
|                   | <i>Pseudaletia unipuncta</i> GV        | PsunGV       | 176.677 | 183     | EU678671         | Li <i>et al.</i> , 2008, unpublished       |
|                   | <i>Spodoptera litura</i> GV K1         | SpltGV K1    | 124.121 | 136     | DQ288858         | Wang <i>et al.</i> , 2007, unpublished     |
|                   | <i>Xestia c-nigrum</i> GV              | XecnGV       | 178.733 | 181     | AF162221         | [44]                                       |
| Gamma-baculovirus | <i>Neodiprion abietis</i> NPV          | NeabNPV      | 84.264  | 93      | DQ317692         | [45]                                       |
|                   | <i>Neodiprion sertifer</i> NPV         | NeseNPV      | 86.462  | 90      | AY430810         | [46]                                       |
|                   | <i>Neodiprion lecontei</i> NPV         | NeleNPV      | 81.755  | 89      | AY349019         | [47]                                       |
| Delta-baculovirus | <i>Culex nigripalpus</i> NPV           | CuniNPV      | 108.252 | 109     | AF403738         | [48]                                       |

## REFERENCES

- Nie ZM, Zhang ZF, Wang D, He PA, Jiang CY, Song L, Chen F, Xu J, Yang L, Yu LL *et al*: **Complete sequence and organization of Antheraea pernyi nucleopolyhedrovirus, a dr-rich baculovirus.** *BMC Genomics* 2007, **8**:248.
- Fan Q, Li S, Wang L, Zhang B, Ye B, Zhao Z, Cui L: **The genome sequence of the multinucleocapsid nucleopolyhedrovirus of the Chinese oak silkworm Antheraea pernyi.** *Virology* 2007, **366**(2):304-315.
- Oliveira JV, Wolff JL, Garcia-Maruniak A, Ribeiro BM, de Castro ME, de Souza ML, Moscardi F, Maruniak JE, Zanotto PM: **Genome of the most widely used viral biopesticide: *Anticarsia gemmatalis* multiple nucleopolyhedrovirus.** *J Gen Virol* 2006, **87**(Pt 11):3233-3250.
- Ayres MD, Howard SC, Kuzio J, Lopez-Ferber M, Possee RD: **The complete DNA sequence of *Autographa californica* nuclear polyhedrosis virus.** *Virology* 1994, **202**(2):586-605.
- Gomi S, Majima K, Maeda S: **Sequence analysis of the genome of *Bombyx mori* nucleopolyhedrovirus.** *J Gen Virol* 1999, **80** ( Pt 5):1323-1337.
- Lauzon HA, Jamieson PB, Krell PJ, Arif BM: **Gene organization and sequencing of the *Choristoneura fumiferana* defective nucleopolyhedrovirus genome.** *J Gen Virol* 2005, **86**(Pt 4):945-961.
- de Jong JG, Lauzon HA, Dominy C, Poloumienko A, Carstens EB, Arif BM, Krell PJ: **Analysis of the *Choristoneura fumiferana* nucleopolyhedrovirus genome.** *J Gen Virol* 2005, **86**(Pt 4):929-943.
- Hyink O, Dellow RA, Olsen MJ, Caradoc-Davies KM, Drake K, Herniou EA, Cory JS, O'Reilly DR, Ward VK: **Whole genome analysis of the *Epiphyas postvittana* nucleopolyhedrovirus.** *J Gen Virol* 2002, **83**(Pt 4):957-971.
- Ikeda M, Shikata M, Shirata N, Chaeychomsri S, Kobayashi M: **Gene organization and complete sequence of the *Hyphantria cunea* nucleopolyhedrovirus genome.** *J Gen Virol* 2006, **87**(Pt 9):2549-2562.
- Chen YR, Wu CY, Lee ST, Wu YJ, Lo CF, Tsai MF, Wang CH: **Genomic and host range studies of *Maruca vitrata* nucleopolyhedrovirus.** *J Gen Virol* 2008, **89**(Pt 9):2315-2330.
- Ahrens CH, Russell RL, Funk CJ, Evans JT, Harwood SH, Rohrmann GF: **The sequence of the *Orgyia pseudotsugata* multinucleocapsid nuclear polyhedrosis virus genome.** *Virology* 1997, **229**(2):381-399.
- Harrison RL, Lynn DE: **Genomic sequence analysis of a nucleopolyhedrovirus isolated from the diamondback moth, *Plutella xylostella*.** *Virus Genes* 2007, **35**(3):857-873.

13. Harrison RL, Bonning BC: **Comparative analysis of the genomes of *Rachiplusia ou* and *Autographa californica* multiple nucleopolyhedroviruses.** *J Gen Virol* 2003, **84**(Pt 7):1827-1842.
14. Nakai M, Goto C, Kang W, Shikata M, Luque T, Kunimi Y: **Genome sequence and organization of a nucleopolyhedrovirus isolated from the smaller tea tortrix, *Adoxophyes honmai*.** *Virology* 2003, **316**(1):171-183.
15. Hilton S, Winstanley D: **Genomic sequence and biological characterization of a nucleopolyhedrovirus isolated from the summer fruit tortrix, *Adoxophyes orana*.** *J Gen Virol* 2008, **89**(Pt 11):2898-2908.
16. Harrison RL: **Genomic sequence analysis of the Illinois strain of the *Agrotis ipsilon* multiple nucleopolyhedrovirus.** *Virus Genes* 2009, **38**(1):155-170.
17. Jakubowska AK, Peters SA, Ziemnicka J, Vlask JM, van Oers MM: **Genome sequence of an enhancin gene-rich nucleopolyhedrovirus (NPV) from *Agrotis segetum*: collinearity with *Spodoptera exigua* multiple NPV.** *J Gen Virol* 2006, **87**(Pt 3):537-551.
18. van Oers MM, Abma-Henkens MH, Herniou EA, de Groot JC, Peters S, Vlask JM: **Genome sequence of *Chrysodeixis chalcites* nucleopolyhedrovirus, a baculovirus with two DNA photolyase genes.** *J Gen Virol* 2005, **86**(Pt 7):2069-2080.
19. Zhu SY, Yi JP, Shen WD, Wang LQ, He HG, Wang Y, Li B, Wang WB: **Genomic sequence, organization and characteristics of a new nucleopolyhedrovirus isolated from *Clanis bilineata* larva.** *BMC Genomics* 2009, **10**:91.
20. Ma XC, Shang JY, Yang ZN, Bao YY, Xiao Q, Zhang CX: **Genome sequence and organization of a nucleopolyhedrovirus that infects the tea looper caterpillar, *Ectropis obliqua*.** *Virology* 2007, **360**(1):235-246.
21. Tang XD, Xiao Q, Ma XC, Zhu ZR, Zhang CX: **Morphology and genome of *Euproctis pseudoconspersa* nucleopolyhedrovirus.** *Virus Genes* 2009, **38**(3):495-506.
22. Zhang CX, Ma XC, Guo ZJ: **Comparison of the complete genome sequence between C1 and G4 isolates of the *Helicoverpa armigera* single nucleocapsid nucleopolyhedrovirus.** *Virology* 2005, **333**(1):190-199.
23. Chen X, WF IJ, Tarchini R, Sun X, Sandbrink H, Wang H, Peters S, Zuidema D, Lankhorst RK, Vlask JM *et al*: **The sequence of the *Helicoverpa armigera* single nucleocapsid nucleopolyhedrovirus genome.** *J Gen Virol* 2001, **82**(Pt 1):241-257.
24. Ogembo JG, Caoili BL, Shikata M, Chaeychomsri S, Kobayashi M, Ikeda M: **Comparative genomic sequence analysis of novel *Helicoverpa armigera* nucleopolyhedrovirus (NPV) isolated from Kenya and three other previously sequenced *Helicoverpa* spp. NPVs.** *Virus Genes* 2009.
25. Chen X, Zhang WJ, Wong J, Chun G, Lu A, McCutchen BF, Presnail JK, Herrmann R, Dolan M, Tingey S *et al*: **Comparative analysis of the complete genome sequences of *Helicoverpa zea* and *Helicoverpa armigera* single-nucleocapsid nucleopolyhedroviruses.** *J Gen Virol* 2002, **83**(Pt 3):673-684.
26. Xiao H, Qi Y: **Genome sequence of *Leucania seperata* nucleopolyhedrovirus.** *Virus Genes* 2007, **35**(3):845-856.
27. Kuzio J, Pearson MN, Harwood SH, Funk CJ, Evans JT, Slavicek JM, Rohrmann GF: **Sequence and analysis of the genome of a baculovirus pathogenic for *Lymantria dispar*.** *Virology* 1999, **253**(1):17-34.
28. Nai YS, Wu CY, Wang TC, Chen YR, Lau WH, Lo CF, Tsai MF, Wang CH: **Genomic sequencing and analyses of *Lymantria xyliana* multiple nucleopolyhedrovirus.** *BMC Genomics* 2010, **11**:116.
29. Li Q, Donly C, Li L, Willis LG, Theilmann DA, Erlandson M: **Sequence and organization of the *Mamestra configurata* nucleopolyhedrovirus genome.** *Virology* 2002, **294**(1):106-121.
30. Li L, Li Q, Willis LG, Erlandson M, Theilmann DA, Donly C: **Complete comparative genomic analysis of two field isolates of *Mamestra configurata* nucleopolyhedrovirus-A.** *J Gen Virol* 2005, **86**(Pt 1):91-105.
31. Li L, Donly C, Li Q, Willis LG, Keddie BA, Erlandson MA, Theilmann DA: **Identification and genomic analysis of a second species of nucleopolyhedrovirus isolated from *Mamestra configurata*.** *Virology* 2002, **297**(2):226-244.
32. Ijkel WFJ, van Strien EA, Heldens JG, Broer R, Zuidema D, Goldbach RW, Vlask JM: **Sequence and organization of the *Spodoptera exigua* multicapsid nucleopolyhedrovirus genome.** *J Gen Virol* 1999, **80** ( Pt 12):3289-3304.
33. Wolff JL, Valicente FH, Martins R, Oliveira JV, Zanutto PM: **Analysis of the genome of *Spodoptera frugiperda* nucleopolyhedrovirus (SfMNPV-19) and of the high genomic heterogeneity in group II nucleopolyhedroviruses.** *J Gen Virol* 2008, **89**(Pt 5):1202-1211.
34. Harrison RL, Puttler B, Popham HJ: **Genomic sequence analysis of a fast-killing isolate of *Spodoptera frugiperda* multiple nucleopolyhedrovirus.** *J Gen Virol* 2008, **89**(Pt 3):775-790.
35. Pang Y, Yu J, Wang L, Hu X, Bao W, Li G, Chen C, Han H, Hu S, Yang H: **Sequence analysis of the *Spodoptera litura* multicapsid nucleopolyhedrovirus genome.** *Virology* 2001, **287**(2):391-404.

36. Willis LG, Seipp R, Stewart TM, Erlandson MA, Theilmann DA: **Sequence analysis of the complete genome of Trichoplusia ni single nucleopolyhedrovirus and the identification of a baculoviral photolyase gene.** *Virology* 2005, **338**(2):209-226.
37. Wormleaton S, Kuzio J, Winstanley D: **The complete sequence of the Adoxophyes orana granulovirus genome.** *Virology* 2003, **311**(2):350-365.
38. Escasa SR, Lauzon HA, Mathur AC, Krell PJ, Arif BM: **Sequence analysis of the Choristoneura occidentalis granulovirus genome.** *J Gen Virol* 2006, **87**(Pt 7):1917-1933.
39. Liang Z, Zhang X, Yin X, Cao S, Xu F: **Genomic sequencing and analysis of Clostera anachoreta granulovirus.** *Arch Virol* 2011, **156**:1185-1198.
40. Lange M, Jehle JA: **The genome of the Cryptophlebia leucotreta granulovirus.** *Virology* 2003, **317**(2):220-236.
41. Luque T, Finch R, Crook N, O'Reilly DR, Winstanley D: **The complete sequence of the Cydia pomonella granulovirus genome.** *J Gen Virol* 2001, **82**(Pt 10):2531-2547.
42. Harrison RL, Popham HJ: **Genomic sequence analysis of a granulovirus isolated from the Old World bollworm, Helicoverpa armigera.** *Virus Genes* 2008, **36**(3):565-581.
43. Hashimoto Y, Hayakawa T, Ueno Y, Fujita T, Sano Y, Matsumoto T: **Sequence analysis of the Plutella xylostella granulovirus genome.** *Virology* 2000, **275**(2):358-372.
44. Hayakawa T, Ko R, Okano K, Seong SI, Goto C, Maeda S: **Sequence analysis of the Xestia c-nigrum granulovirus genome.** *Virology* 1999, **262**(2):277-297.
45. Duffy SP, Young AM, Morin B, Lucarotti CJ, Koop BF, Levin DB: **Sequence analysis and organization of the Neodiprion abietis nucleopolyhedrovirus genome.** *J Virol* 2006, **80**(14):6952-6963.
46. Garcia-Maruniak A, Maruniak JE, Zanotto PM, Doumbouya AE, Liu JC, Merritt TM, Lanoie JS: **Sequence analysis of the genome of the Neodiprion sertifer nucleopolyhedrovirus.** *J Virol* 2004, **78**(13):7036-7051.
47. Lauzon HA, Lucarotti CJ, Krell PJ, Feng Q, Retnakaran A, Arif BM: **Sequence and organization of the Neodiprion lecontei nucleopolyhedrovirus genome.** *J Virol* 2004, **78**(13):7023-7035.
48. Afonso CL, Tulman ER, Lu Z, Balinsky CA, Moser BA, Becnel JJ, Rock DL, Kutish GF: **Genome sequence of a baculovirus pathogenic for Culex nigripalpus.** *J Virol* 2001, **75**(22):11157-11165.
